# Supplementary material
Source: ML conference proceedings conference paper supplement (https://openreview.net/forum?id=mHC2K_6akV)
Supplement: supplementary_material [file attachment]

---

# Fixed-Budget Best-Arm Identification with Heterogeneous Reward Variances (Supplementary Material)

---

Anusha Lalitha

Kousha Kalantari

Yifei Ma

Anoop Deoras

Branislav Kveton

AWS AI Labs

{anlalith, kkalant, yifeim, adeoras, bkveton}@amazon.com

## A PROOF OF THEOREM 3

First, we decompose the probability of choosing a suboptimal arm. For any  $s \in [m]$ , let  $E_s = \{1 \in \mathcal{A}_{s+1}\}$  be the event that the best arm is not eliminated in stage  $s$  and  $\bar{E}_s$  be its complement. Then by the law of total probability,

$$\mathbb{P}(\hat{I} \neq 1) = \mathbb{P}(\bar{E}_m) = \sum_{s=1}^m \mathbb{P}(\bar{E}_s, E_{s-1}, \dots, E_1) \leq \sum_{s=1}^m \mathbb{P}(\bar{E}_s | E_{s-1}, \dots, E_1).$$

We bound  $\mathbb{P}(\bar{E}_s | E_{s-1}, \dots, E_1)$  based on the observation that the best arm can be eliminated only if the estimated mean rewards of at least a half of the arms in  $\mathcal{A}_s$  are at least as high as that of the best arm. Specifically, let  $\mathcal{A}'_s = \mathcal{A}_s \setminus \{1\}$  be the set of all arms in stage  $s$  but the best arm and

$$N'_s = \sum_{i \in \mathcal{A}'_s} \mathbb{1}\{\hat{\mu}_{s,i} \geq \hat{\mu}_{s,1}\}.$$

Then by the Markov's inequality,

$$\mathbb{P}(\bar{E}_s | E_{s-1}, \dots, E_1) \leq \mathbb{P}\left(N'_s \geq \frac{n_s}{2} \mid E_{s-1}, \dots, E_1\right) \leq \frac{2 \mathbb{E}[N'_s | E_{s-1}, \dots, E_1]}{n_s}.$$

The key step in bounding the above expectation is understanding the probability that any arm has a higher estimated mean reward than the best one. We bound this probability next.

**Lemma 1.** *For any stage  $s \in [m]$  with the best arm,  $1 \in \mathcal{A}_s$ , and any suboptimal arm  $i \in \mathcal{A}_s$ , we have*

$$\mathbb{P}(\hat{\mu}_{s,i} \geq \hat{\mu}_{s,1}) \leq \exp\left[-\frac{n_s \Delta_i^2}{4 \sum_{j \in \mathcal{A}_s} \sigma_j^2}\right].$$

*Proof.* The proof is based on concentration inequalities for sub-Gaussian random variables [Boucheron et al., 2013]. In particular, since  $\hat{\mu}_{s,i} - \mu_i$  and  $\hat{\mu}_{s,1} - \mu_1$  are sub-Gaussian with variance proxies  $\sigma_i^2/N_{s,i}$  and  $\sigma_1^2/N_{s,1}$ , respectively; their difference is sub-Gaussian with a variance proxy  $\sigma_i^2/N_{s,i} + \sigma_1^2/N_{s,1}$ . It follows that

$$\begin{aligned} \mathbb{P}(\hat{\mu}_{s,i} \geq \hat{\mu}_{s,1}) &= \mathbb{P}(\hat{\mu}_{s,i} - \hat{\mu}_{s,1} \geq 0) = \mathbb{P}((\hat{\mu}_{s,i} - \mu_i) - (\hat{\mu}_{s,1} - \mu_1) > \Delta_i) \\ &\leq \exp\left[-\frac{\Delta_i^2}{2\left(\frac{\sigma_i^2}{N_{s,i}} + \frac{\sigma_1^2}{N_{s,1}}\right)}\right] = \exp\left[-\frac{n_s \Delta_i^2}{4 \sum_{j \in \mathcal{A}_s} \sigma_j^2}\right], \end{aligned}$$

where the last step follows from the definitions of  $N_{s,i}$  and  $N_{s,1}$  in Lemma 1. □

The last major step is bounding  $\mathbb{E}[N'_s | E_{s-1}, \dots, E_1]$  with the help of Lemma 1. Starting with the union bound, we get

$$\begin{aligned} \mathbb{E}[N'_s | E_{s-1}, \dots, E_1] &\leq \sum_{i \in \mathcal{A}'_s} \mathbb{P}(\hat{\mu}_{s,i} \geq \hat{\mu}_{s,1}) \leq \sum_{i \in \mathcal{A}'_s} \exp\left[-\frac{n_s \Delta_i^2}{4 \sum_{j \in \mathcal{A}_s} \sigma_j^2}\right] \\ &\leq n_s \max_{i \in \mathcal{A}'_s} \exp\left[-\frac{n_s \Delta_i^2}{4 \sum_{j \in \mathcal{A}_s} \sigma_j^2}\right] = n_s \exp\left[-\frac{n_s \min_{i \in \mathcal{A}'_s} \Delta_i^2}{4 \sum_{j \in \mathcal{A}_s} \sigma_j^2}\right]. \end{aligned}$$

Now we chain all inequalities and get

$$\mathbb{P}(\hat{I} \neq 1) \leq 2 \sum_{s=1}^m \exp\left[-\frac{n_s \min_{i \in \mathcal{A}'_s} \Delta_i^2}{4 \sum_{j \in \mathcal{A}_s} \sigma_j^2}\right].$$

To get the final claim, we use that

$$m = \log_2 K, \quad n_s = \frac{n}{\log_2 K}, \quad \min_{i \in \mathcal{A}'_s} \Delta_i^2 \geq \Delta_{\min}^2, \quad \sum_{j \in \mathcal{A}_s} \sigma_j^2 \leq \sum_{j \in \mathcal{A}} \sigma_j^2.$$

This concludes the proof.

## B PROOF OF THEOREM 4

This proof has the same steps as that in Appendix A. The only difference is that  $N_{s,i}$  and  $N_{s,1}$  in Lemma 1 are replaced with their lower bounds, based on the following lemma.

**Lemma 2.** Fix stage  $s$  and arm  $i \in \mathcal{A}_s$  in SHVar. Then

$$N_{s,i} \geq \frac{\sigma_i^2}{\sigma_{\max}^2} \left( \frac{n_s}{|\mathcal{A}_s|} - 1 \right),$$

where  $\sigma_{\max} = \max_{i \in \mathcal{A}} \sigma_i$  is the maximum reward noise and  $n_s$  is the budget in stage  $s$ .

*Proof.* Let  $J$  be the most pulled arm in stage  $s$  and  $\ell \in [n_s]$  be the round where arm  $J$  is pulled the last time. By the design of SHVar, since arm  $J$  is pulled in round  $\ell$ ,

$$\frac{\sigma_J^2}{N_{s,\ell,J}} \geq \frac{\sigma_i^2}{N_{s,\ell,i}}$$

holds for any arm  $i \in \mathcal{A}_s$ . This can be further rearranged as

$$N_{s,\ell,i} \geq \frac{\sigma_i^2}{\sigma_J^2} N_{s,\ell,J}.$$

Since arm  $J$  is the most pulled arm in stage  $s$  and  $\ell$  is the round of its last pull,

$$N_{s,\ell,J} = N_{s,J} - 1 \geq \frac{n_s}{|\mathcal{A}_s|} - 1.$$

Moreover,  $N_{s,i} \geq N_{s,\ell,i}$ . Now we combine all inequalities and get

$$N_{s,i} \geq \frac{\sigma_i^2}{\sigma_J^2} \left( \frac{n_s}{|\mathcal{A}_s|} - 1 \right). \quad (1)$$

To eliminate dependence on random  $J$ , we use  $\sigma_J \leq \sigma_{\max}$ . This concludes the proof.  $\square$

When plugged into Lemma 1, we get

$$\mathbb{P}(\hat{\mu}_{s,i} \geq \hat{\mu}_{s,1}) \leq \exp\left[-\frac{\Delta_i^2}{2 \left( \frac{\sigma_i^2}{N_{s,i}} + \frac{\sigma_1^2}{N_{s,1}} \right)}\right] \leq \exp\left[-\frac{\left( \frac{n_s}{|\mathcal{A}_s|} - 1 \right) \Delta_i^2}{4 \sigma_{\max}^2}\right].$$

This completes the proof.

## C PROOF OF THEOREM 5

This proof has the same steps as that in Appendix A. The main difference is that  $N_{s,i}$  and  $N_{s,1}$  in Lemma 1 are replaced with their lower bounds, based on the following lemma.

**Lemma 3.** Fix stage  $s$  and arm  $i \in \mathcal{A}_s$  in SHAdaVar. Then

$$N_{s,i} \geq \frac{\sigma_i^2}{\sigma_{\max}^2} \alpha(|\mathcal{A}_s|, n_s, \delta) \left( \frac{n_s}{|\mathcal{A}_s|} - 1 \right),$$

where  $\sigma_{\max} = \max_{i \in \mathcal{A}} \sigma_i$  is the maximum reward noise,  $n_s$  is the budget in stage  $s$ , and

$$\alpha(k, n, \delta) = \frac{1 - 2\sqrt{\frac{\log(1/\delta)}{n/k-2}}}{1 + 2\sqrt{\frac{\log(1/\delta)}{n/k-2}} + \frac{2\log(1/\delta)}{n/k-2}}$$

is an arm-independent constant.

*Proof.* Let  $J$  be the most pulled arm in stage  $s$  and  $\ell \in [n_s]$  be the round where arm  $J$  is pulled the last time. By the design of SHAdaVar, since arm  $J$  is pulled in round  $\ell$ ,

$$\frac{U_{s,\ell,J}}{N_{s,\ell,J}} \geq \frac{U_{s,\ell,i}}{N_{s,\ell,i}}$$

holds for any arm  $i \in \mathcal{A}_s$ . Analogously to (1), this inequality can be rearranged and loosened as

$$N_{s,i} \geq \frac{U_{s,\ell,i}}{U_{s,\ell,J}} \left( \frac{n_s}{|\mathcal{A}_s|} - 1 \right). \quad (2)$$

We bound  $U_{s,\ell,i}$  from below using the fact that  $U_{s,\ell,i} \geq \sigma_i^2$  holds with probability at least  $1 - \delta$ , based on the first claim in Lemma 2. To bound  $U_{s,\ell,J}$ , we apply the second claim in Lemma 2 to bound  $\hat{\sigma}_{s,\ell,J}^2$  in  $U_{s,\ell,J}$ , and get that

$$U_{s,\ell,J} \leq \sigma_J^2 \frac{1 + 2\sqrt{\frac{\log(1/\delta)}{N_{s,\ell,J}-1}} + \frac{2\log(1/\delta)}{N_{s,\ell,J}-1}}{1 - 2\sqrt{\frac{\log(1/\delta)}{N_{s,\ell,J}-1}}}$$

holds with probability at least  $1 - \delta$ . Finally, we plug both bounds into (2) and get

$$N_{s,i} \geq \frac{\sigma_i^2}{\sigma_J^2} \frac{1 - 2\sqrt{\frac{\log(1/\delta)}{N_{s,\ell,J}-1}}}{1 + 2\sqrt{\frac{\log(1/\delta)}{N_{s,\ell,J}-1}} + \frac{2\log(1/\delta)}{N_{s,\ell,J}-1}} \left( \frac{n_s}{|\mathcal{A}_s|} - 1 \right).$$

To eliminate dependence on random  $J$ , we use that  $\sigma_J \leq \sigma_{\max}$  and  $N_{s,\ell,J} \geq n_s/|\mathcal{A}_s| - 1$ . This yields our claim and concludes the proof of Lemma 3.  $\square$

Similarly to Lemma 2, this bound is asymptotically tight when all reward variances are identical. Also  $\alpha(|\mathcal{A}_s|, n_s, \delta) \rightarrow 1$  as  $n_s \rightarrow \infty$ . Therefore, the bound has the same shape as that in Lemma 2.

The application of Lemma 3 requires more care. Specifically, it relies on high-probability confidence intervals derived in Lemma 2, which need  $N_{s,t,i} > 4\log(1/\delta) + 1$ . This is guaranteed whenever  $n \geq K \log_2 K(4\log(1/\delta) + 1)$ . Moreover, since the confidence intervals need to hold in any stage  $s$  and round  $t$ , and for any arm  $i$ , we need a union bound over  $Kn$  events. This leads to the following claim.

Suppose that  $n \geq K \log_2 K(4\log(1/\delta) + 1)$ . Then, when Lemma 3 is plugged into Lemma 1, we get that

$$\mathbb{P}(\hat{\mu}_{s,i} \geq \hat{\mu}_{s,1}) \leq \exp \left[ -\frac{\Delta_i^2}{2 \left( \frac{\sigma_i^2}{N_{s,i}} + \frac{\sigma_1^2}{N_{s,1}} \right)} \right] \leq \exp \left[ -\frac{\alpha(|\mathcal{A}_s|, n_s, Kn\delta) \left( \frac{n_s}{|\mathcal{A}_s|} - 1 \right) \Delta_i^2}{4\sigma_{\max}^2} \right].$$

This completes the proof.

## References

Stephane Boucheron, Gabor Lugosi, and Pascal Massart. *Concentration Inequalities: A Nonasymptotic Theory of Independence*. Oxford University Press, 2013.
